# Supplementary material for: Template-free synthesis of carbon hollow spheres and reduced graphene oxide from spent lithium-ion batteries towards efficient gas storage
Source: Royal Society of Chemistry journal article supplement (doi:10.1039/c8ta11521d), 2019-01-01
Supplement: c8ta11521d1.pdf [file c8ta11521d1.pdf]

## Supplementary Information

### Template-Free Synthesis of Carbon Hollow Spheres and Reduced Graphene Oxide from Spent Lithium-ion Batteries towards Efficient Gas Storage

Subramanian Natarajan<sup>a,b</sup>, Hari C. Bajaj<sup>a\*</sup>, and Vanchiappan Aravindan<sup>b\*</sup>

<sup>a</sup> Inorganic Materials and Catalysis Division (IMCD), CSIR-Central Salt and Marine Chemicals Research Institute (CSIR-CSMCRI), Council of Scientific and Industrial Research Institute (CSIR), G. B. Marg, Bhavnagar-364 002, Gujarat, India.

<sup>b</sup> Department of Chemistry, Indian Institute of Science Education and Research (IISER), Tirupati-517507, India

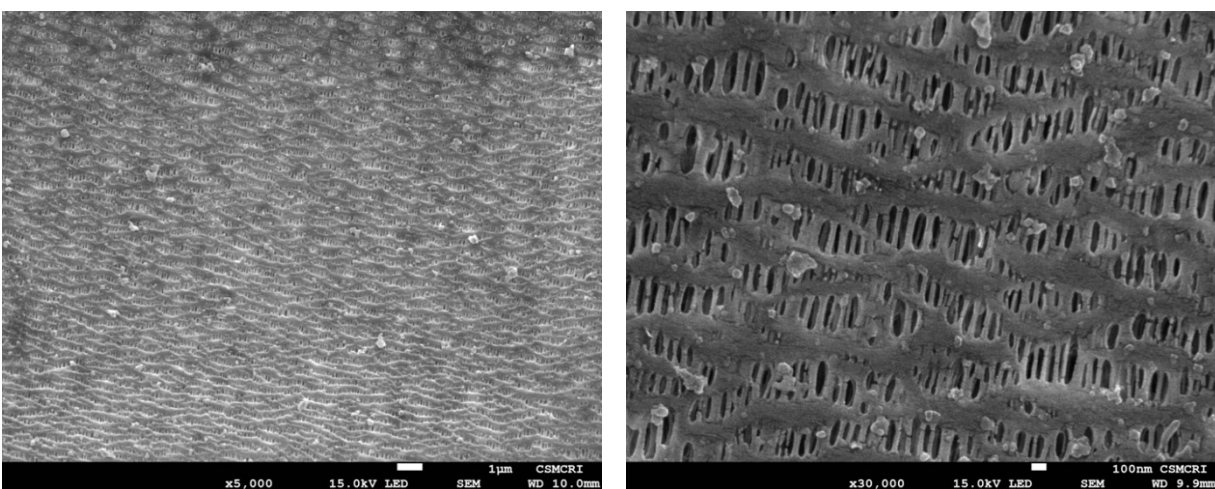

**Figure S1:** FE-SEM images of recovered separators (PP and PE) from spent LIBs (Random sampling).

---

\* Corresponding authors: *E-mail:* [hcbajaj@csmcri.res.in](mailto:hcbajaj@csmcri.res.in) (HC. Bajaj), and [aravind\\_van@yahoo.com](mailto:aravind_van@yahoo.com) (V. Aravindan)

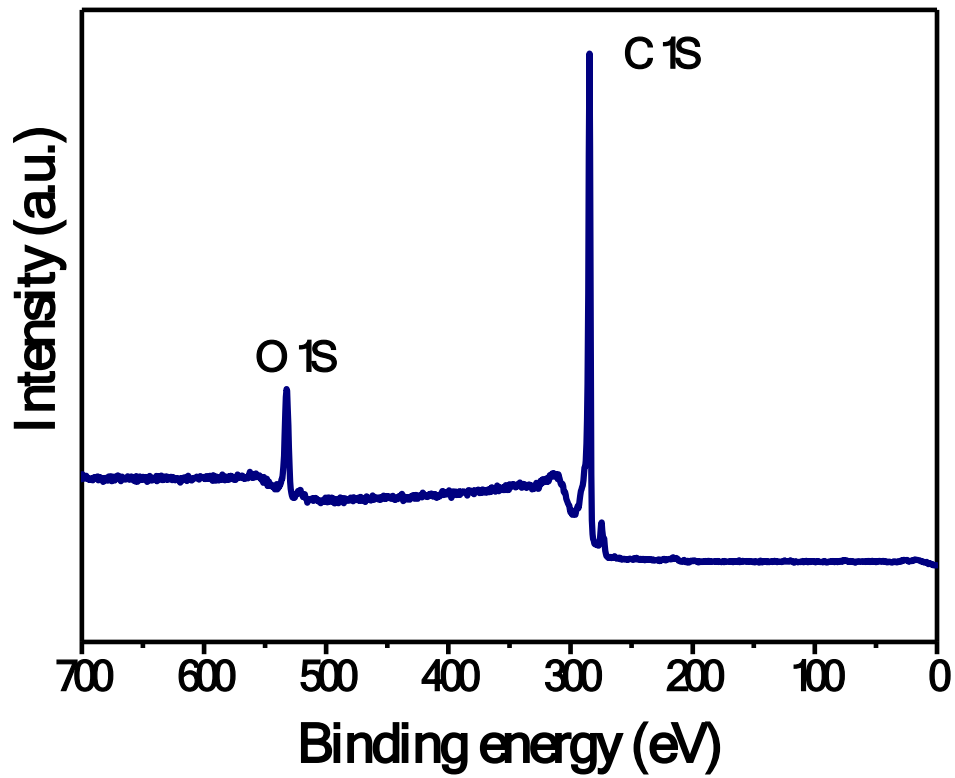

Figure S2: XPS survey spectra of rGO
